# Supplementary material for: The pronounced effect of cobalt oxide on the electrocatalytic activity of palladium nanoparticles anchored on CoOx/NC towards the ORR with increased MA and ECSA
Source: Royal Society of Chemistry journal article supplement (doi:10.1039/d2ma00871h), 2022-11-29
Supplement: d2ma00871h1.pdf [file d2ma00871h1.pdf]

### Supplementary information

## **Pronounced effect of cobalt oxide on the electrocatalytic activity of palladium nanoparticles anchored on CoO<sub>x</sub>/NC towards ORR with increased MA and ECSA**

### **Determination of electron number**

For the determination of electron number, Koutechy-Levich plots were drawn at different potentials from which electron number was calculated according to the formula given below.<sup>1</sup>

$$\frac{1}{j} = \frac{1}{jd} + \frac{1}{jk}$$

$$\frac{1}{j} = \frac{1}{B\sqrt{W}} + \frac{1}{jk}$$

$$jd = 0.62nFC_0 (D_0)^{2/3} (V)^{-1/6}$$

### **ECSA measurement**

Electrochemical active surface area was calculated from palladium oxide layer reduction curve at potential limit of 1.4 V<sub>RHE</sub> according to the following formula.<sup>2</sup>

$$ECSA = \frac{Q_0}{q^0}$$

$Q^0$  = Charge contained in the CV curve

$q^0$  = standard value for Pd – based catalysts

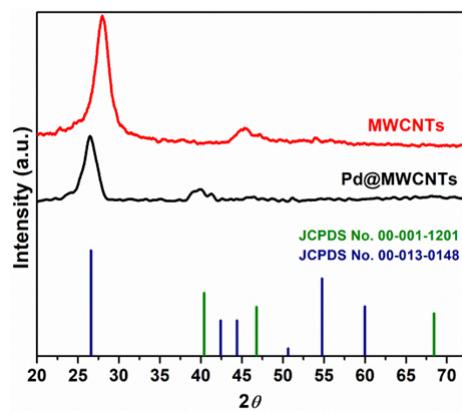

**Figure S1.** XRD pattern of MWCNTs and Pd@MWCNTs

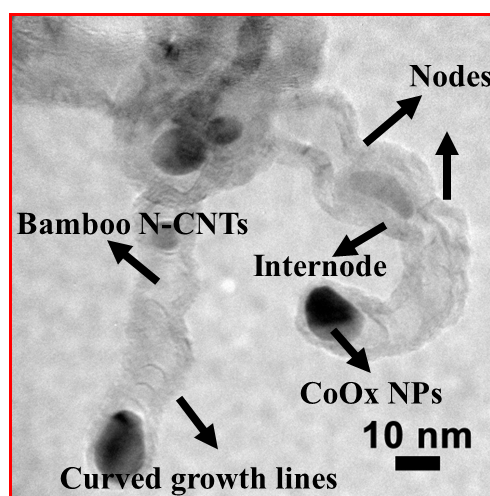

**Figure S2.** HRTEM image of CoOx/NC at 10nm

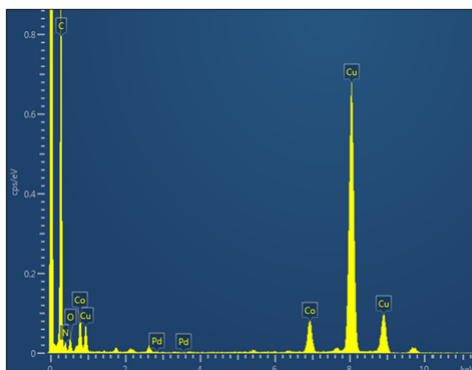

Figure S3. EDX analysis of Pd@CoOx/NC1

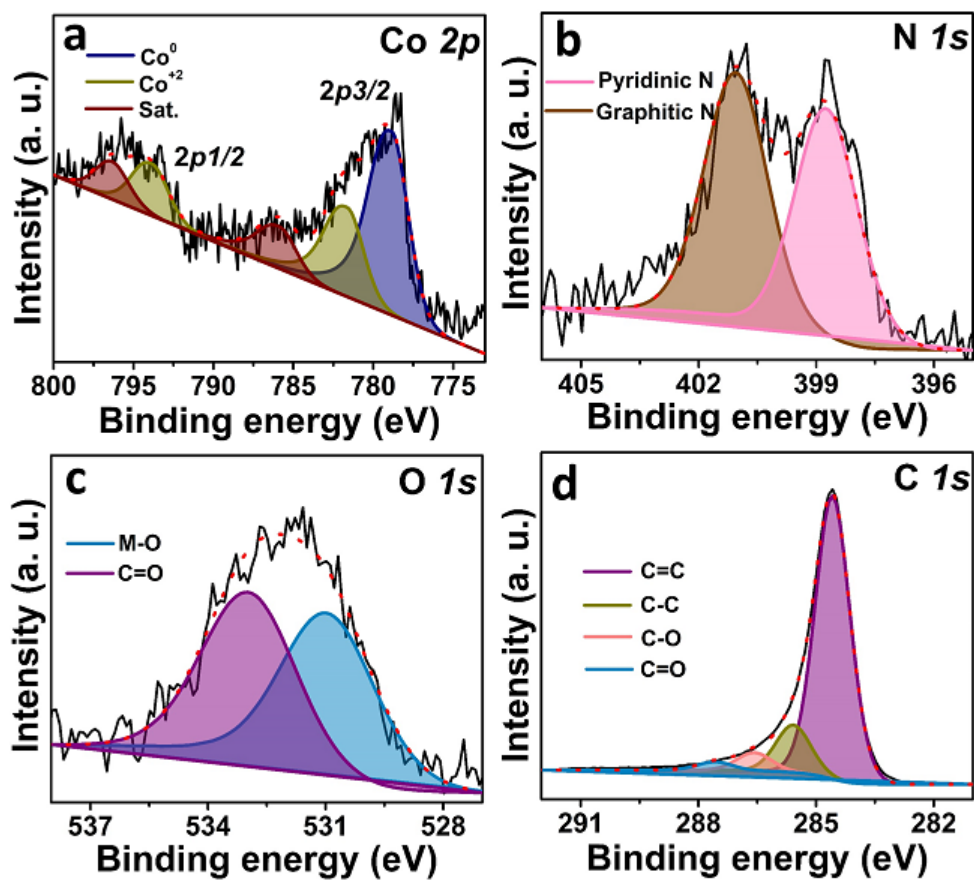

Figure S4. XPS spectrum of CoOx/NC (a) Co 2p (b) N 1s (c) O 1s (d) C 1s<sup>3</sup>

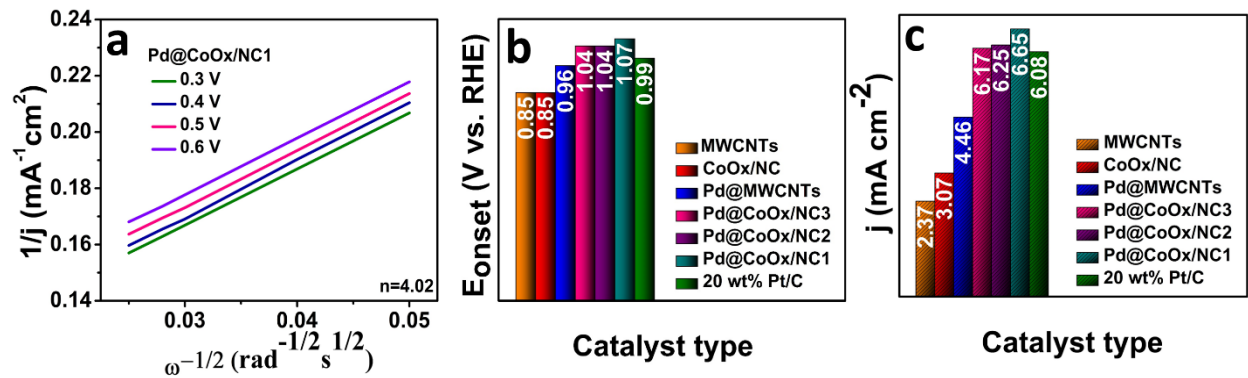

**Figure S5.** (a) K-L plot of Pd@CoOx/NC1 in 0.1M KOH (b) comparison of  $E_{onset}$  of the synthesized catalysts with 20 wt% Pt/C in 0.1M KOH (c) comparison of  $j_m$  of the synthesized catalysts with 20 wt% Pt/C in 0.1M KOH

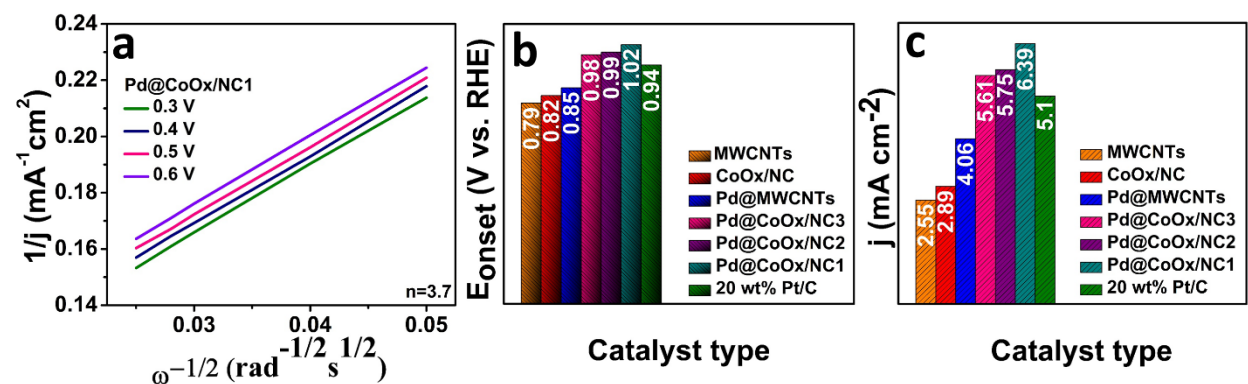

**Figure S6.** (a) K-L plot of Pd@CoOx/NC1 in 0.1M HClO<sub>4</sub> (b) comparison of  $E_{onset}$  of the synthesized catalysts with 20 wt% Pt/C in 0.1M HClO<sub>4</sub> (c) comparison of  $j_m$  of the synthesized catalysts with 20 wt% Pt/C in 0.1M HClO<sub>4</sub>

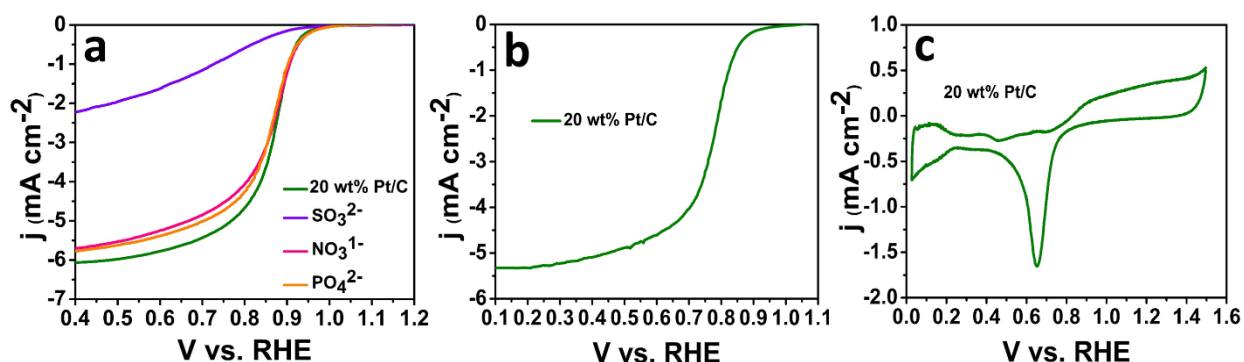

**Figure S7.** (a) ORR electrocatalytic performance of 20 wt% Pt/C in the presence of SO<sub>3</sub><sup>2-</sup>, NO<sub>3</sub><sup>1-</sup>, HPO<sub>4</sub><sup>2-</sup> anions in O<sub>2</sub> saturated 0.1M KOH at 10 mVs<sup>-1</sup> (b) LSV polarization curve of 20 wt% Pt/C in 0.1 M HClO<sub>4</sub> at 10 mV s<sup>-1</sup> (c) Pt-O layer reduction curve of 20 wt% Pt/C at 1.4 V<sub>RHE</sub> in 0.1 M HClO<sub>4</sub> at a scan rate of 50 mV s<sup>-1</sup> in Ar saturated environment

| Catalyst    | Poisonous specie               | E <sub>onset</sub> (V <sub>RHE</sub> ) |                | E <sub>1/2</sub> (V <sub>RHE</sub> ) |                | j (mA cm <sup>-2</sup> ) |                |
|-------------|--------------------------------|----------------------------------------|----------------|--------------------------------------|----------------|--------------------------|----------------|
|             |                                | before addition                        | after addition | before addition                      | after addition | before addition          | after addition |
| Pd@CoOx/NC1 | SO <sub>3</sub> <sup>2-</sup>  | 1.07                                   | 1.06           | 0.95                                 | 0.941          | 6.65                     | 6.19           |
|             | NO <sub>3</sub> <sup>1-</sup>  | 1.07                                   | 1.06           | 0.95                                 | 0.948          | 6.65                     | 6.27           |
|             | HPO <sub>4</sub> <sup>2-</sup> | 1.07                                   | 1.06           | 0.95                                 | 0.945          | 6.65                     | 6.23           |
| 20 wt% Pt/C | SO <sub>3</sub> <sup>2-</sup>  | 0.99                                   | 0.96           | 0.865                                | 0.679          | 6.08                     | 2.25           |
|             | NO <sub>3</sub> <sup>1-</sup>  | 0.99                                   | 0.99           | 0.865                                | 0.854          | 6.08                     | 5.72           |
|             | HPO <sub>4</sub> <sup>2-</sup> | 0.99                                   | 0.99           | 0.865                                | 0.856          | 6.08                     | 5.78           |

**Table S1.** ORR evaluating parameters of synthesized catalysts in the presence of toxic species

## References

1. I. A. Khan, Y. Qian, A. Badshah, M. A. Nadeem, and D. Zhao, *ACS Appl. Mater. Interfaces*, 2016, **8** (27), 17268-17275.
2. L.-I. Fang, Q. Tao, M.-f. Li, L.-w. Liao, D. Chen, and Y.-x. Chen, *Chinese J. Chem. Phys.*, 2010, **23** (5), 543-548.
3. I. Khan, F. Nasim, M. Choucair, s. Ullah, A. Badshah and M. Nadeem, *RSC Adv.* 2016, **6** (2), 1129-1135.
